# Supplementary material for: Clinical Features and Prognoses of Patients With Breast Cancer Who Underwent Surgery
Source: PubMed Central journal article supplement (PMC10457722; doi:10.1001/jamanetworkopen.2023.31078), 2023-08-25

## Supplemental Online Content

Liu G, Kong X, Dai Q, et al. Clinical features and prognoses of patients with breast cancer who underwent surgery. *JAMA Netw Open*. 2023;6(8):e2331078.  
doi:10.1001/jamanetworkopen.2023.31078

**eTable 1.** Survival analysis of different pathological types in all breast cancer patients using the Cox regression model

**eTable 2.** Univariate overall survival analysis of variables using Cox regression model

**eTable 3.** Univariate disease-free survival analysis of variables using Cox regression model

**eTable 4.** Multivariate Analysis of Clinical and Pathologic Factors Associated With OS and DFS in all breast cancer patients

**eTable 5.** Characteristics of T1-2 IDC patients who underwent surgery before and after propensity score matching

**eFigure.** Survival plot of T1-2 IDC patients underwent BCS and mastectomy (M) in the propensity-score matching cohort

This supplemental material has been provided by the authors to give readers additional information about their work.

eTable 1. Survival analysis of different pathological types in all breast cancer patients using the Cox regression model.

|              | OS               |              |           | DFS              |              |           |
|--------------|------------------|--------------|-----------|------------------|--------------|-----------|
|              | p value          | hazard ratio | 95.0% CI  | p value          | hazard ratio | 95.0% CI  |
| DCIS vs IDC  | <b>&lt;0.001</b> | 0.21         | 0.14-0.31 | <b>&lt;0.001</b> | 0.28         | 0.21-0.37 |
| MIBC vs IDC  | <b>&lt;0.001</b> | 0.18         | 0.10-0.33 | <b>&lt;0.001</b> | 0.24         | 0.15-0.37 |
| MucC vs IDC  | <b>0.004</b>     | 0.42         | 0.23-0.75 | <b>&lt;0.001</b> | 0.32         | 0.18-0.57 |
| ILC vs IDC   | 0.99             | 1.00         | 0.66-1.53 | 0.33             | 0.83         | 0.56-1.21 |
| MedC vs IDC  | 0.05             | 0.25         | 0.06-1.02 | <b>0.04</b>      | 0.35         | 0.13-0.94 |
| IMPC vs IDC  | 0.98             | 1.01         | 0.48-2.13 | 0.88             | 1.05         | 0.56-1.95 |
| MPC vs IDC   | <b>0.002</b>     | 2.64         | 1.42-4.92 | 0.50             | 1.29         | 0.61-2.71 |
| AC vs IDC    | 0.16             | 0.37         | 0.09-1.48 | 0.32             | 0.64         | 0.27-1.54 |
| OTIBC vs IDC | 0.90             | 1.04         | 0.60-1.79 | 0.96             | 1.01         | 0.64-1.61 |

Abbreviations: AC, apocrine carcinoma. DFS, disease-free survival. IDC, invasive ductal carcinoma. ILC, invasive lobular carcinoma. IMPC, invasive micropapillary carcinoma. MedC, medullary carcinoma. MIBC, microinvasive breast cancer. MPC, metaplastic carcinoma. MucC, mucinous carcinoma. OS, overall survival.

1 eTable 2. Univariate overall survival analysis of variables using Cox regression model.

|                 | IDC     | DCIS                     | MIBC    | MucC                                   | ILC     | MedC                                                   | IMPC    | MPC                                   | AC      | OTIBC                                                  |      |                                                       |      |                                        |       |                                      |      |                                        |                                       |                                      |
|-----------------|---------|--------------------------|---------|----------------------------------------|---------|--------------------------------------------------------|---------|---------------------------------------|---------|--------------------------------------------------------|------|-------------------------------------------------------|------|----------------------------------------|-------|--------------------------------------|------|----------------------------------------|---------------------------------------|--------------------------------------|
|                 | p value | hazard ratio<br>(95% CI) | p value | hazard ratio<br>(95% CI)               | p value | hazard ratio<br>(95% CI)                               | p value | hazard ratio<br>(95% CI)              | p value | hazard ratio<br>(95% CI)                               |      |                                                       |      |                                        |       |                                      |      |                                        |                                       |                                      |
| Female vs Male  | 0.33    | 0.71<br>(0.35-1.42)      | 0.80    | 20.28<br>(0.00-2.46*10 <sup>11</sup> ) | 0.89    | 20.28<br>(0.00-8.61*10 <sup>17</sup> )                 | NA      | NA                                    | NA      | NA                                                     | NA   | NA                                                    | NA   | NA                                     | NA    | NA                                   | NA   | 0.74                                   | 20.77<br>(0.00-9.71*10 <sup>6</sup> ) |                                      |
| Age             | <0.001  | 1.02<br>(1.02-1.03)      | <0.001  | 1.06<br>(1.03-1.10)                    | <0.001  | 1.11<br>(1.06-1.17)                                    | <0.001  | 1.09<br>(1.04-1.14)                   | 0.002   | 1.06<br>(1.02-1.11)                                    | 0.06 | 1.09<br>(1.00-1.20)                                   | 1.00 | 1.00<br>(0.93-1.08)                    | 0.10  | 1.04<br>(0.99-1.09)                  | 0.25 | 1.08<br>(0.95-1.22)                    | 0.22                                  | 1.03<br>(0.98-1.08)                  |
| BCS vs M        | <0.001  | 0.70<br>(0.60-0.81)      | 0.52    | 1.31<br>(0.57-2.97)                    | 0.06    | 3.27<br>(0.94-11.41)                                   | 0.27    | 1.96<br>(0.59-6.38)                   | 0.13    | 0.21<br>(0.03-1.57)                                    | 0.57 | 0.03<br>(0.00-6.97*10 <sup>3</sup> )                  | 0.54 | 0.04<br>(0.00-1.20*10 <sup>3</sup> )   | 0.12  | 0.20<br>(0.02-1.56)                  | 0.43 | 142.31<br>(0.00-3.56*10 <sup>7</sup> ) | 0.37                                  | 1.66<br>(0.55-4.95)                  |
| Concurrent DCIS | <0.001  | 0.78<br>(0.71-0.87)      | NA      | NA                                     | 0.58    | 22.31<br>(0.00-1.41*10 <sup>6</sup> )                  | 0.96    | 1.03<br>(0.27-3.89)                   | 0.08    | 0.37<br>(0.12-1.11)                                    | 0.16 | 7.35<br>(0.46-117.58)                                 | 0.46 | 0.54<br>(0.10-2.78)                    | 0.32  | 0.45<br>(0.10-2.14)                  | 0.50 | 0.02<br>(0.00-1.90*10 <sup>3</sup> )   | 0.25                                  | 0.41<br>(0.09-1.85)                  |
| Invasive Size   | <0.001  | 1.38<br>(1.34-1.41)      | NA      | NA                                     | NA      | NA                                                     | 0.05    | 1.23<br>(1.00-1.50)                   | <0.001  | 1.31<br>(1.13-1.52)                                    | NA   | NA                                                    | 0.62 | 1.16<br>(0.64-2.11)                    | 0.003 | 1.36<br>(1.11-1.67)                  | 0.84 | 1.19<br>(0.23-6.10)                    | 0.78                                  | 1.06<br>(0.72-1.56)                  |
| Grade 2 vs 1    | <0.001  | 2.42<br>(1.76-3.34)      | 0.77    | 1.34<br>(0.19-9.50)                    | 0.96    | 4.06*10 <sup>4</sup><br>(0.00-1.45*10 <sup>196</sup> ) | 0.65    | 0.02<br>(0.00-7.65*10 <sup>5</sup> )  | 0.97    | 2.69*10 <sup>4</sup><br>(0.00-8.84*10 <sup>209</sup> ) | NA   | NA                                                    | 1.00 | 1.02<br>(0.00-1.40*10 <sup>23</sup> )  | 1.00  | 1.00<br>(0.00-3.61*10 <sup>3</sup> ) | 0.77 | 65.27<br>(0.00-7.06*10 <sup>13</sup> ) | NA                                    | NA                                   |
| Grade 3 vs 1    | <0.001  | 3.63<br>(2.63-5.02)      | 0.30    | 2.21<br>(0.49-9.89)                    | 0.96    | 2.41*10 <sup>4</sup><br>(0.00-8.57*10 <sup>195</sup> ) | 0.59    | 0.02<br>(0.00-4.61*10 <sup>4</sup> )  | 0.97    | 3.05*10 <sup>4</sup><br>(0.00-1.00*10 <sup>210</sup> ) | 0.86 | 22.30<br>(0.00-2.74*10 <sup>19</sup> )                | 0.89 | 43.92<br>(0.00-2.43*10 <sup>24</sup> ) | 1.00  | 1.00<br>(0.00-3.36*10 <sup>3</sup> ) | 1.00 | 1.00<br>(0.00-5.03*10 <sup>14</sup> )  | 0.40                                  | 2.57<br>(0.29-23.16)                 |
| LVI             | <0.001  | 1.83<br>(1.64-2.05)      | NA      | NA                                     | 0.79    | 0.05<br>(0.00-3.54*10 <sup>8</sup> )                   | 0.60    | 0.05<br>(0.00-4.61*10 <sup>3</sup> )  | 0.84    | 1.23<br>(0.16-9.22)                                    | 0.90 | 0.05<br>(0.00-3.72*10 <sup>18</sup> )                 | 0.37 | 2.13<br>(0.41-11.20)                   | 0.03  | 5.85<br>(1.18-29.15)                 | 0.76 | 0.04<br>(0.00-2.85*10 <sup>7</sup> )   | 0.96                                  | 0.94<br>(0.12-7.33)                  |
| NI              | 0.08    | 1.17<br>(0.98-1.40)      | 0.85    | 0.05<br>(0.00-8.79*10 <sup>11</sup> )  | NA      | NA                                                     | 0.86    | 0.05<br>(0.00-5.70*10 <sup>12</sup> ) | 0.39    | 0.53<br>(0.12-2.28)                                    | 0.88 | 0.05<br>(0.00-1.98*10 <sup>13</sup> )                 | 0.67 | 0.04<br>(0.00-6.37*10 <sup>4</sup> )   | 0.05  | 8.74<br>(0.98-78.21)                 | 0.78 | 0.04<br>(0.00-1.33*10 <sup>8</sup> )   | 0.75                                  | 0.05<br>(0.00-5.21*10 <sup>6</sup> ) |
| Number Of LNM   | <0.001  | 1.07<br>(1.06-1.07)      | 0.005   | 1.09<br>(1.02-1.15)                    | 0.73    | 0.45<br>(0.00-46.58)                                   | 0.22    | 1.06<br>(0.97-1.16)                   | 0.003   | 1.07<br>(1.02-1.12)                                    | 0.75 | 1.28<br>(0.27-6.02)                                   | 0.80 | 1.00<br>(0.95-1.07)                    | 0.84  | 1.06<br>(0.60-1.86)                  | 0.70 | 0.33<br>(0.00-96.05)                   | 0.08                                  | 1.07<br>(0.99-1.15)                  |
| DM              | <0.001  | 6.51<br>(5.02-8.42)      | 0.85    | 0.05<br>(0.00-3.63*10 <sup>12</sup> )  | NA      | NA                                                     | 0.88    | 0.05<br>(0.00-1.06*10 <sup>15</sup> ) | 0.001   | 14.02<br>(3.14-62.61)                                  | NA   | NA                                                    | 0.85 | 0.05<br>(0.00-1.52*10 <sup>12</sup> )  | 0.75  | 0.05<br>(0.00-4.50*10 <sup>6</sup> ) | NA   | NA                                     | 0.03                                  | 10.38<br>(1.26-85.41)                |
| HR pos vs neg   | <0.001  | 0.53<br>(0.48-0.59)      | 0.21    | 0.55<br>(0.21-1.41)                    | 0.95    | 1.05<br>(0.29-3.75)                                    | 0.68    | 21.45<br>(0.00-5.22*10 <sup>7</sup> ) | 0.01    | 0.24<br>(0.08-0.75)                                    | 0.69 | 0.03<br>(0.00-1.09*10 <sup>6</sup> )                  | 0.03 | 0.19<br>(0.04-0.84)                    | 0.39  | 0.04<br>(0-71.27)                    | 0.78 | 0.04<br>(0.00-1.76*10 <sup>8</sup> )   | 0.01                                  | 0.17<br>(0.04-0.67)                  |
| HER2 pos vs neg | <0.001  | 1.28<br>(1.15-1.44)      | 0.02    | 5.56<br>(1.25-24.65)                   | 0.88    | 0.89<br>(0.20-4.01)                                    | 0.54    | 0.04<br>(0.00-1.16*10 <sup>3</sup> )  | 0.84    | 0.81<br>(0.11-6.07)                                    | 0.69 | 1.28*10 <sup>3</sup><br>(0.00-1.51*10 <sup>18</sup> ) | 0.67 | 1.46<br>(0.25-8.42)                    | 0.61  | 0.04<br>(0.00-6.90*10 <sup>3</sup> ) | 0.91 | 0.05<br>(0.00-4.92-10 <sup>22</sup> )  | 0.93                                  | 0.91<br>(0.11-7.32)                  |

2 Abbreviations: AC, apocrine carcinoma. BCS, breast-conserving surgery. DCIS, ductal carcinoma in situ. DFS, disease-free survival. DM, distant metastasis. HER2, human epidermal growth factor receptor-2. HR, hormone receptor. IDC, invasive ductal carcinoma.

3 ILC, invasive lobular carcinoma. IMPC, invasive micropapillary carcinoma. LNM, lymph node metastases. LVI, lymphovascular invasion. M, mastectomy. MedC, medullary carcinoma. MIBC, microinvasive breast cancer. MPC, metaplastic carcinoma. MucC,

4 mucinous carcinoma. NA, not applicable. NI, nerve invasion. OTIBC, other types of invasive breast cancer.

5

1 eTable 3. Univariate disease-free survival analysis of variables using Cox regression model.

|                 | IDC     |                          | DCIS    |                                       | MIBC    |                                                        | MucC    |                                       | ILC     |                                                        | MedC    |                                                       | IMPC    |                          | MPC     |                                      | AC      |                                        | OTIBC   |                                                        |
|-----------------|---------|--------------------------|---------|---------------------------------------|---------|--------------------------------------------------------|---------|---------------------------------------|---------|--------------------------------------------------------|---------|-------------------------------------------------------|---------|--------------------------|---------|--------------------------------------|---------|----------------------------------------|---------|--------------------------------------------------------|
|                 | p value | hazard ratio<br>(95% CI) | p value | hazard ratio<br>(95% CI)              | p value | hazard ratio<br>(95% CI)                               | p value | hazard ratio<br>(95% CI)              | p value | hazard ratio<br>(95% CI)                               | p value | hazard ratio<br>(95% CI)                              | p value | hazard ratio<br>(95% CI) | p value | hazard ratio<br>(95% CI)             | p value | hazard ratio<br>(95% CI)               | p value | hazard ratio<br>(95% CI)                               |
| Female vs male  | 0.38    | 0.76<br>(0.41-1.41)      | 0.73    | 20.28<br>(0.00-6.45*10 <sup>8</sup> ) | 0.84    | 20.27<br>(0-7.65*10 <sup>13</sup> )                    | NA      | NA                                    | NA      | NA                                                     | NA      | NA                                                    | NA      | NA                       | NA      | NA                                   | NA      | NA                                     | 0.23    | 3.50<br>(0.45-27.07)                                   |
| Age             | 0.42    | 1.00<br>(0.99-1.00)      | 0.55    | 1.01<br>(0.98-1.03)                   | 0.90    | 1.00<br>(0.96-1.05)                                    | 0.55    | 0.99<br>(0.95-1.03)                   | 0.53    | 1.01<br>(0.98-1.05)                                    | 0.87    | 0.99<br>(0.91-1.09)                                   | 0.25    | 0.96<br>(0.91-1.03)      | 0.75    | 1.01<br>(0.95-1.08)                  | 0.37    | 1.04<br>(0.95-1.14)                    | 0.81    | 0.99<br>(0.95-1.04)                                    |
| BCS vs M        | <0.001  | 0.81<br>(0.71-0.91)      | 0.007   | 2.20<br>(1.24-3.91)                   | 0.84    | 1.12<br>(0.40-3.13)                                    | 0.14    | 2.34<br>(0.75-7.25)                   | 0.18    | 0.37<br>(0.09-1.57)                                    | 0.65    | 1.57<br>(0.22-11.29)                                  | 0.75    | 0.72<br>(0.09-5.66)      | 0.25    | 0.02<br>(0.00-13.46)                 | 0.25    | 2.88<br>(0.48-17.25)                   | 0.24    | 1.76<br>(0.69-4.51)                                    |
| Concurrent DCIS | 0.009   | 0.89<br>(0.82-0.97)      | NA      | NA                                    | 0.84    | 1.23<br>(0.16-9.18)                                    | 0.07    | 2.81<br>(0.90-8.71)                   | 0.20    | 0.55<br>(0.22-1.38)                                    | 0.18    | 5.28<br>(0.47-59.60)                                  | 0.12    | 0.29<br>(0.06-1.36)      | 0.31    | 0.33<br>(0.04-2.83)                  | 0.32    | 0.33<br>(0.04-2.95)                    | 0.39    | 0.61<br>(0.20-1.87)                                    |
| Invasive Size   | <0.001  | 1.33<br>(1.30-1.36)      | NA      | NA                                    | NA      | NA                                                     | 0.82    | 1.05<br>(0.67-1.66)                   | <0.001  | 1.52<br>(1.25-1.84)                                    | 0.98    | 1.02<br>(0.22-4.63)                                   | 0.22    | 1.31<br>(0.85-2.03)      | 0.08    | 1.23<br>(0.97-1.56)                  | 0.09    | 2.90<br>(0.86-9.78)                    | 0.77    | 1.05<br>(0.75-1.48)                                    |
| Grade 2 vs 1    | <0.001  | 3.45<br>(2.53-4.69)      | 0.09    | 3.28<br>(0.85-12.69)                  | 0.96    | 1.05*10 <sup>5</sup><br>(0.00-4.19*10 <sup>207</sup> ) | NA      | NA                                    | 0.96    | 2.32*10 <sup>4</sup><br>(0.00-3.60*10 <sup>194</sup> ) | NA      | NA                                                    | NA      | NA                       | 1.00    | 1.00<br>(0.00-4.15*10 <sup>3</sup> ) | 0.77    | 65.29<br>(0.00-7.06*10 <sup>13</sup> ) | 0.96    | 9.38*10 <sup>4</sup><br>(0.00-3.05*10 <sup>195</sup> ) |
| Grade 3 vs 1    | <0.001  | 4.27<br>(3.13-5.83)      | 0.06    | 3.19<br>(0.96-10.57)                  | 0.96    | 6.63*10 <sup>4</sup><br>(0.00-2.64*10 <sup>207</sup> ) | 0.34    | 3.30<br>(0.29-37.63)                  | 0.96    | 5.55*10 <sup>4</sup><br>(0.00-8.61*10 <sup>194</sup> ) | 0.81    | 24.64<br>(0.00-4.32*10 <sup>12</sup> )                | 0.18    | 0.19<br>(0.02-2.20)      | 1.00    | 1.00<br>(0.00-3.48*10 <sup>3</sup> ) | 1.00    | 1.00<br>(0.00-5.03*10 <sup>14</sup> )  | 0.96    | 2.00*10 <sup>5</sup><br>(0.00-6.50*10 <sup>195</sup> ) |
| LVI             | <0.001  | 1.82<br>(1.65-2.00)      | NA      | NA                                    | 0.73    | 0.05<br>(0.00-1.18*10 <sup>6</sup> )                   | 0.58    | 0.05<br>(0.00-2.91*10 <sup>3</sup> )  | 0.17    | 2.76<br>(0.64-11.91)                                   | 0.93    | 0.05<br>(0.00-4.27*10 <sup>28</sup> )                 | 0.87    | 0.90<br>(0.26-3.16)      | 0.25    | 3.57<br>(0.41-30.72)                 | 0.63    | 0.04<br>(0.00-1.85*10 <sup>4</sup> )   | 0.74    | 1.29<br>(0.29-5.64)                                    |
| NI              | 0.68    | 1.03<br>(0.88-1.21)      | 0.79    | 0.05<br>(0.00-2.65*10 <sup>8</sup> )  | NA      | NA                                                     | 0.89    | 0.05<br>(0.00-1.05*10 <sup>18</sup> ) | 0.50    | 1.41<br>(0.52-3.85)                                    | 0.04    | 12.18<br>(1.07-137.98)                                | 0.71    | 1.48<br>(0.18-11.81)     | 0.80    | 0.05<br>(0.00-7.11*10 <sup>8</sup> ) | 0.65    | 0.04<br>(0.00-4.01*10 <sup>4</sup> )   | 0.28    | 3.07<br>(0.40-23.47)                                   |
| Number Of LNM   | <0.001  | 1.06<br>(1.06-1.07)      | 0.01    | 1.08<br>(1.02-1.14)                   | 0.89    | 1.03<br>(0.73-1.44)                                    | 0.37    | 1.04<br>(0.95-1.15)                   | <0.001  | 1.08<br>(1.03-1.12)                                    | 0.52    | 0.10<br>(0.00-109.80)                                 | 0.27    | 1.02<br>(0.98-1.06)      | 0.49    | 1.23<br>(0.68-2.21)                  | 0.79    | 0.89<br>(0.37-2.11)                    | 0.01    | 1.08<br>(1.02-1.15)                                    |
| HR pos vs neg   | <0.001  | 0.72<br>(0.65-0.79)      | 0.45    | 0.75<br>(0.36-1.59)                   | 0.05    | 3.52<br>(1.03-12.11)                                   | 0.71    | 21.30<br>(0.00-1.65*10 <sup>8</sup> ) | 0.03    | 0.30<br>(0.10-0.89)                                    | 0.97    | 1.05<br>(0.09-11.72)                                  | 0.004   | 0.16<br>(0.04-0.56)      | 0.49    | 0.04<br>(0.00-410.13)                | 0.63    | 0.04<br>(0.00-1.88*10 <sup>4</sup> )   | 0.02    | 0.26<br>(0.09-0.79)                                    |
| HER2 pos vs neg | 0.02    | 1.13<br>(1.02-1.25)      | 0.06    | 2.42<br>(0.95-6.19)                   | 0.18    | 0.49<br>(0.17-1.41)                                    | 0.50    | 0.04<br>(0.00-411.91)                 | 0.18    | 2.30<br>(0.68-7.83)                                    | 0.89    | 1.49*10 <sup>5</sup><br>(0.00-1.76*10 <sup>78</sup> ) | 0.22    | 2.34<br>(0.60-9.11)      | 0.66    | 0.04<br>(0.00-4.04*10 <sup>4</sup> ) | 0.91    | 0.05<br>(0.00-4.92*10 <sup>22</sup> )  | 0.73    | 0.69<br>(0.09-5.42)                                    |

1 Abbreviations: AC, apocrine carcinoma. BCS, breast-conserving surgery. DCIS, ductal carcinoma in situ. DFS, disease-free survival. DM, distant metastasis. HER2, human epidermal growth factor receptor-2. HR, hormone receptor. IDC, invasive ductal carcinoma.  
2 ILC, invasive lobular carcinoma. IMPC, invasive micropapillary carcinoma. LNM, lymph node metastases. LVI, lymphovascular invasion. M, mastectomy. MedC, medullary carcinoma. MIBC, microinvasive breast cancer. MPC, metaplastic carcinoma. MucC,  
3 mucinous carcinoma. NA, not applicable. NI, nerve invasion. OTIBC, other types of invasive breast cancer.  
4

1 eTable 4. Multivariate Analysis of Clinical and Pathologic Factors Associated With OS and  
 2 DFS in all breast cancer patients.

|                 | OS               |              |                            | DFS              |              |            |
|-----------------|------------------|--------------|----------------------------|------------------|--------------|------------|
|                 | p value          | hazard ratio | 95.0% CI                   | p value          | hazard ratio | 95.0% CI   |
| Age             | <b>&lt;0.001</b> | 1.03         | 1.02-1.03                  | 0.39             | 1.00         | 1.00-1.01  |
| BCS vs M        | <b>0.05</b>      | 0.80         | 0.64-1.00                  | 0.74             | 1.03         | 0.88-1.21  |
| OTIBC vs IDC    | 0.31             | 1.81         | 0.58-5.64                  | 0.58             | 1.38         | 0.44-4.30  |
| DCIS vs IDC     | 0.21             | 0.57         | 0.23-1.39                  | 0.12             | 0.57         | 0.28-1.15  |
| MIBC vs IDC     | 0.11             | 0.40         | 0.13-1.24                  | 0.11             | 0.52         | 0.23-1.17  |
| ILC vs IDC      | 0.59             | 1.37         | 0.44-4.26                  | 0.61             | 1.29         | 0.48-3.46  |
| MucC vs IDC     | 0.92             | 0            | 0.00-5.87×10 <sup>64</sup> | 0.65             | 1.58         | 0.22-11.33 |
| MedC vs IDC     | 0.90             | 0            | 0.00-2.59×10 <sup>56</sup> | 0.55             | 0.55         | 0.08-3.92  |
| IMPC vs IDC     | 0.40             | 0.43         | 0.06-3.08                  | 0.22             | 0.29         | 0.04-2.07  |
| MPC vs IDC      | <b>0.03</b>      | 3.05         | 1.13-8.24                  | 0.88             | 1.12         | 0.28-4.50  |
| AC vs IDC       | 0.76             | 0.73         | 0.10-5.23                  | 0.60             | 0.59         | 0.08-4.19  |
| Concurrent DCIS | 0.60             | 0.97         | 0.86-1.11                  | 0.76             | 0.98         | 0.88-1.10  |
| Invasive Size   | <b>&lt;0.001</b> | 1.29         | 1.23-1.34                  | <b>&lt;0.001</b> | 1.26         | 1.21-1.30  |
| Grade 2 vs 1    | <b>0.007</b>     | 1.78         | 1.17-2.72                  | <b>&lt;0.001</b> | 2.91         | 1.96-4.32  |
| Grade 3 vs 1    | <b>0.001</b>     | 2.13         | 1.37-3.30                  | <b>&lt;0.001</b> | 3.04         | 2.02-4.58  |
| LVI             | <b>&lt;0.001</b> | 1.33         | 1.15-1.54                  | <b>&lt;0.001</b> | 1.36         | 1.20-1.53  |
| NI              | 0.50             | 1.08         | 0.87-1.34                  | 0.59             | 1.05         | 0.87-1.27  |

|                 |                  |      |           |                  |      |               |
|-----------------|------------------|------|-----------|------------------|------|---------------|
| Number Of LNM   | <b>&lt;0.001</b> | 1.05 | 1.05-1.06 | <b>&lt;0.001</b> | 1.05 | 1.04-<br>1.05 |
| DM              | <b>&lt;0.001</b> | 4.48 | 3.06-6.56 | NA               | NA   | NA            |
| Ki67            | <b>0.002</b>     | 1.68 | 1.21-2.34 | 0.27             | 1.18 | 0.88-<br>1.58 |
| HR pos vs neg   | <b>&lt;0.001</b> | 0.66 | 0.57-0.76 | <b>0.004</b>     | 0.82 | 0.72-<br>0.94 |
| HER2 pos vs neg | 0.09             | 0.88 | 0.77-1.02 | 0.05             | 0.89 | 0.79-<br>1.00 |

- 1 Abbreviations: AC, apocrine carcinoma. BCS, breast-conserving surgery. DCIS, ductal carcinoma in situ.
- 2 DFS, disease-free survival. DM, distant metastasis. HER2, human epidermal growth factor receptor-2. HR,
- 3 hormone receptor. IDC, invasive ductal carcinoma. ILC, invasive lobular carcinoma. IMPC, invasive
- 4 micropapillary carcinoma. LVI, lymphovascular invasion. LNM, lymph node metastases. M, mastectomy.
- 5 MedC, medullary carcinoma. MIBC, microinvasive breast cancer. MPC, metaplastic carcinoma. MucC,
- 6 mucinous carcinoma. NI, nerve invasion. OS, overall survival. OTIBC, other types of invasive breast cancer.
- 7

eTable 5. Characteristics of T1-2 IDC patients who underwent surgery before and after propensity score matching.

|                              | Before Matching   |                   |        | After Matching    |                   |      |
|------------------------------|-------------------|-------------------|--------|-------------------|-------------------|------|
|                              | BCS               | M                 | p      | BCS               | M                 | p    |
| Number                       | 1503              | 6879              |        | 1503              | 3006              |      |
| Sex (Female, %)              | 1502 (99.9)       | 6854 (99.6)       | 0.11   | 1502 (99.9)       | 2993 (99.6)       | 0.07 |
| Age (mean (SD))              | 49.25 (10.98)     | 52.59 (10.37)     | <0.001 | 49.25 (10.98)     | 49.84 (9.65)      | 0.06 |
| Concurrent DCIS (%)          | 661 (44.0)        | 3184 (46.3)       | 0.11   | 661 (44.0)        | 1359 (45.2)       | 0.45 |
| Invasive Size (median [IQR]) | 1.70 [1.20, 2.10] | 2.00 [1.50, 2.60] | <0.001 | 1.70 [1.20, 2.10] | 1.70 [1.20, 2.20] | 0.43 |
| Grade (%)                    |                   |                   | <0.001 |                   |                   | 0.38 |
| 1                            | 154 (10.2)        | 426 (6.2)         |        | 154 (10.2)        | 272 (9.0)         |      |
| 2                            | 886 (58.9)        | 4091 (59.5)       |        | 886 (58.9)        | 1817 (60.4)       |      |
| 3                            | 463 (30.8)        | 2362 (34.3)       |        | 463 (30.8)        | 917 (30.5)        |      |
| LVI (%)                      | 231 (15.4)        | 1468 (21.3)       | <0.001 | 231 (15.4)        | 463 (15.4)        | 1    |
| NI (%)                       | 129 (8.6)         | 622 (9.0)         | 0.61   | 129 (8.6)         | 248 (8.3)         | 0.75 |
| Number Of LNM (median [IQR]) | 0.00 [0.00, 1.00] | 0.00 [0.00, 2.00] | <0.001 | 0.00 [0.00, 1.00] | 0.00 [0.00, 1.00] | 0.39 |
| Ki67 (median [IQR])          | 0.25 [0.10, 0.40] | 0.25 [0.15, 0.40] | <0.001 | 0.25 [0.10, 0.40] | 0.20 [0.15, 0.40] | 0.67 |
| HR (%)                       | 1211 (80.6)       | 5181 (75.3)       | <0.001 | 1211 (80.6)       | 2395 (79.7)       | 0.50 |
| HER2 (%)                     | 284 (19.9)        | 1978 (28.8)       | <0.001 | 284 (18.9)        | 579 (19.3)        | 0.80 |

Abbreviations: BCS, breast-conserving surgery. DCIS, ductal carcinoma in situ. HER2, human epidermal growth factor receptor-2. HR, hormone receptor. IDC, invasive ductal carcinoma. LVI, lymphovascular invasion. LNM, lymph node metastases. M, mastectomy. NI, nerve invasion. OS, overall survival.



eFigure. Survival plot of T1-2 IDC patients underwent BCS and mastectomy (M) in the propensity-score matching cohort. A shows OS; B shows DFS.

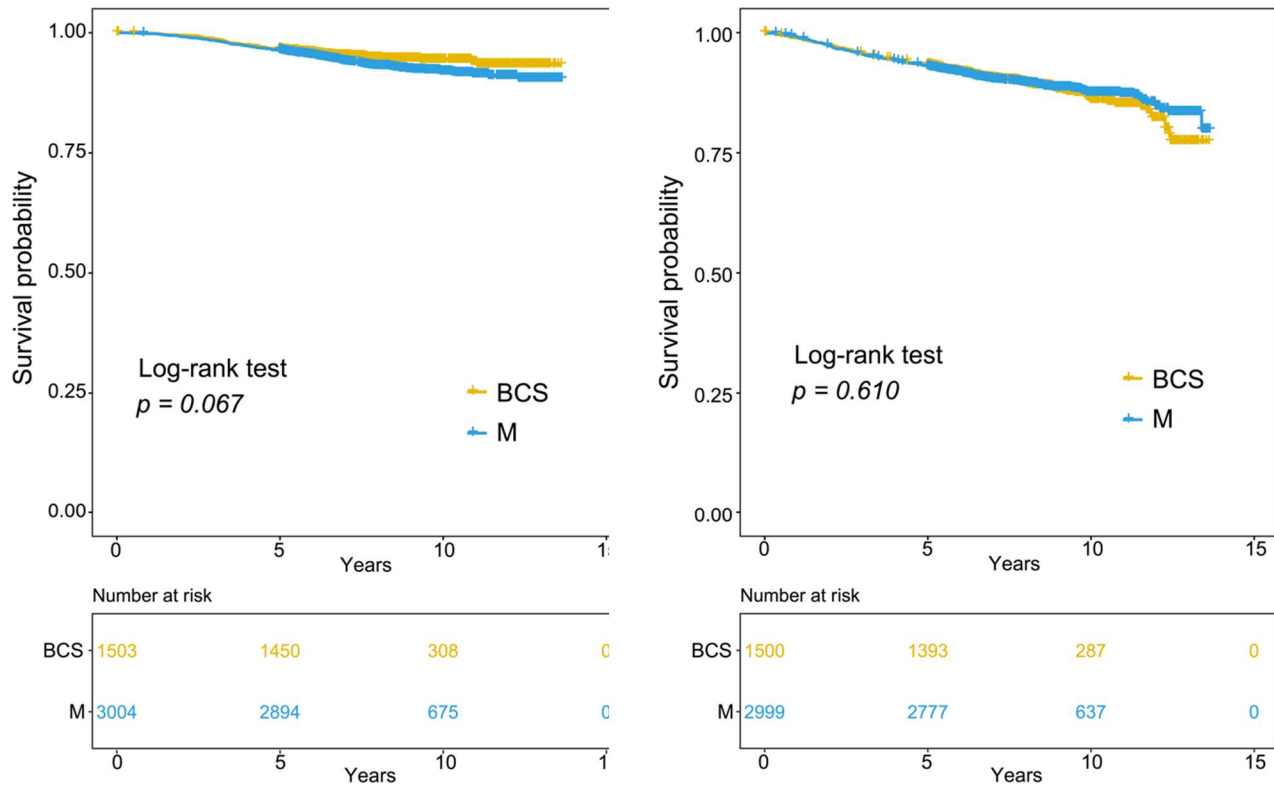

Supplement: jamanetwopen-e2331078-s001.pdf [file jamanetwopen-e2331078-s001.pdf]
