# Supplementary material for: Clinical Features and Prognoses of Patients With Breast Cancer Who Underwent Surgery
Source: PubMed Central journal article supplement (PMC10457722; doi:10.1001/jamanetworkopen.2023.31078), 2023-08-25
Supplement: jamanetwopen-e2331078-s002.pdf [file jamanetwopen-e2331078-s002.pdf]

## Data Sharing Statement

Liu. Clinical Features and Prognoses of Patients With Breast Cancer Who Underwent Surgery. *JAMA Netw Open*. Published August 25, 2023. doi:10.1001/jamanetworkopen.2023.31078

### Data

**Data available:** Yes

**Data types:** Data (not involving human participants)

**How to access data:** Data are available upon reasonable request and requests must be sent to [yidoctor99@126.com](mailto:yidoctor99@126.com).

**When available:** With publication

### Supporting Documents

**Document types:** None

### Additional Information

**Who can access the data:** Data are available upon reasonable request.

**Types of analyses:** Data are available upon reasonable request.

**Mechanisms of data availability:** with investigator support
